# Supplementary material
Source: HighWire-hosted journal article supplement (https://bmjopen.bmj.com/content/11/6/e049053)
Supplement: inline-supplementary-material-1 [file inline-supplementary-material-1.pdf]

**SUPPLEMENTARY MATERIAL**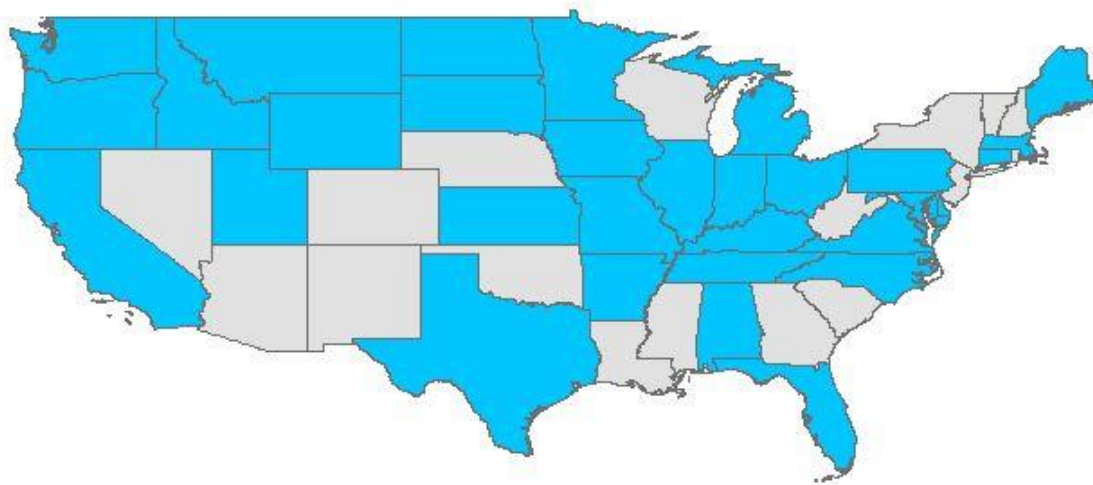

Appedix Figure 1. Location of officers who responded to the national survey regarding the enforcement of cellphone use while driving. Officers from states which are shaded participated in the survey.
